# Supplementary material for: Cerebrospinal fluid immunoglobulins in primary progressive multiple sclerosis are pathogenic
Source: PubMed Central journal article supplement — Brain. 2023 Feb 3;146(5):1979–92. doi: 10.1093/brain/awad031 (PMC10151187; doi:10.1093/brain/awad031), 2023-02-03
Supplement: awad031_supplementary_data.pdf [file awad031_supplementary_data.pdf]

**Supplementary Table 1 Patient Demographics for CSF samples used in lysolecithin model**

| Diagnosis                                               | <b>PPMS</b>   | <b>RRMS</b>   | <b>SPMS</b>   | <b>HC</b>     |
|---------------------------------------------------------|---------------|---------------|---------------|---------------|
| No. of patients (CSF samples)                           | 8             | 7             | 6             | 3             |
| Age at sample collection, mean (SD), years              | 56.3 (9.3)    | 38.9 (12.9)   | 60.0 (11.1)   | 50.3 (17.6)   |
| Gender distribution                                     | 3 F; 5 M      | 7 F; 0 M      | 4 F; 2 M      | 1 F; 2 M      |
| EDSS at sample collection, mean (SD)                    | 6.13 (1.96)   | 1.93 (2.40)   | 5.70 (1.04)   | N/A           |
| Disease duration at sample collection, mean (SD), years | 10.6 (7.1)    | 2.5 (1.7)     | 7.2 (3.9)     | N/A           |
| CSF cell count per mL, mean (SD)                        | 1535 (1257)   | 3837 (3583)   | 1775 (2666)   | N/A           |
| CSF protein concentration, mean (SD), µg/mL             | 929.1 (253.1) | 787.7 (167.7) | 872.3 (255.5) | 793.3 (221.0) |

HC: healthy control; EDSS: Expanded Disability Status Scale

**Supplementary Table 2 Patient Demographics for PPMS CSF samples used for filtration and IgG depletion**

|                                                         | <b>5 kDa filtration</b> | <b>100 kDa filtration</b> | <b>IgG depletion</b> |
|---------------------------------------------------------|-------------------------|---------------------------|----------------------|
| No. of patients (CSF samples)                           | 4                       | 4                         | 3                    |
| Age at sample collection, mean (SD), years              | 44.5 (14.1)             | 40.0 (12.6)               | 40.0 (13.2)          |
| Gender distribution                                     | 2 F; 2 M                | 2 F; 2 M                  | 1 F; 2 M             |
| EDSS at sample collection, mean (SD)                    | 5.4 (3.2)               | 3.9 (3.2)                 | 4.3 (2.9)            |
| Disease duration at sample collection, mean (SD), years | 11.8 (12.3)             | 8.6 (11.8)                | 7.0 (9.6)            |
| CSF cell count per mL, mean (SD)                        | 13024 (20664)           | 14868 (20033)             | 16797 (23561)        |
| CSF protein concentration, mean (SD), µg/mL             | 781.0 (203.1)           | 854.8 (181.2)             | 830.1 (217.7)        |

EDSS: Expanded Disability Status Scale

**Supplementary Table 3 Cell counts for CSF samples used to produce IgG1 rAbs for intrathecal injections**

| <b>Patient CSF sample</b> | <b>No. of lymphocytes</b> | <b>No. of CD19<sup>+</sup>CD138<sup>-</sup> B cells</b> | <b>No. of CD19<sup>+</sup>CD138<sup>+</sup> plasmablasts</b> | <b>No. of CD19<sup>-</sup>CD138<sup>+</sup> plasma cells</b> | <b>No. of expanded clones</b> | <b>Isotype of original antibody</b> |
|---------------------------|---------------------------|---------------------------------------------------------|--------------------------------------------------------------|--------------------------------------------------------------|-------------------------------|-------------------------------------|
| PPMS 1                    | 1640                      | 10                                                      | 0                                                            | 12                                                           | 0                             | IgG/IgM                             |
| PPMS 2                    | 12746                     | 84                                                      | 32                                                           | 4                                                            | 2                             | IgG                                 |
| PPMS 3                    | 13271                     | 59                                                      | 71                                                           | 15                                                           | 5                             | IgG                                 |
| PPMS 4                    | 1701                      | 10                                                      | 9                                                            | 3                                                            | 0                             | IgG                                 |
| PPMS 5                    | 98390                     | 2772                                                    | 454                                                          | 10                                                           | 6                             | IgG                                 |
| PPMS 6                    | 51335                     | 641                                                     | 580                                                          | 8                                                            | 7                             | IgG                                 |
| PPMS 7                    | 65228                     | 936                                                     | 903                                                          | 44                                                           | 5                             | IgG                                 |
| RRMS 1                    | 6042                      | 20                                                      | 1                                                            | 6                                                            | 0                             | IgM                                 |
| RRMS 2                    | 4429                      | 7                                                       | 0                                                            | 0                                                            | 0                             | IgM                                 |
| RRMS 3                    | 59838                     | 1981                                                    | 84                                                           | 6                                                            | 3                             | IgG                                 |
| RRMS 4                    | 6205                      | 39                                                      | 7                                                            | 14                                                           | 1                             | IgG                                 |
| SPMS 1                    | 12442                     | 204                                                     | 58                                                           | 6                                                            | 1                             | IgA                                 |
| SPMS 2                    | 6017                      | 146                                                     | 304                                                          | 18                                                           | 7                             | IgG                                 |
| SPMS 3                    | 995                       | 7                                                       | 31                                                           | 0                                                            | 1                             | IgG                                 |
| SPMS 4                    | 8850                      | 28                                                      | 40                                                           | 56                                                           | 2                             | IgG                                 |
| DC 1                      | 16900                     | 145                                                     | 17                                                           | 18                                                           | 0                             | IgG                                 |
| DC 2                      | 1736                      | 28                                                      | 0                                                            | 9                                                            | 0                             | IgM                                 |
| DC 3                      | 5171                      | 11                                                      | 0                                                            | 4                                                            | 0                             | IgG                                 |

rAb: recombinant antibody; DC: disease control

**Supplementary Table 4 Pathogenic effects of IgG1 rAbs used for intrathecal injections**

| <b>Patient</b> | <b>No. of rAbs injected</b> | <b>Percentage of mice with motor deficits (%)</b> | <b>Demyelinated Lesions?</b> | <b>Positive human IgG staining in mouse spinal cord?</b> |
|----------------|-----------------------------|---------------------------------------------------|------------------------------|----------------------------------------------------------|
| PPMS 1         | 2                           | 78 (7/9)                                          | Yes (1/2 rAbs)               | Yes                                                      |
| PPMS 2         | 2                           | 50 (3/6)                                          | Yes (1/2 rAbs)               | N/A                                                      |
| PPMS 3         | 2                           | 73 (11/15)                                        | Yes (2/2 rAbs)               | Yes                                                      |
| PPMS 4         | 1                           | 100 (3/3)                                         | No                           | Yes                                                      |
| PPMS 5         | 2                           | 67 (2/3)                                          | No                           | Yes                                                      |
| PPMS 6         | 3                           | 75 (9/12)                                         | Yes (1/3 rAbs)               | Yes                                                      |
| PPMS 7         | 1                           | 100 (3/3)                                         | No                           | Yes                                                      |
| RRMS 1         | 1                           | 17 (1/6)                                          | No                           | No                                                       |
| RRMS 2         | 1                           | 50 (1/2)                                          | No                           | Yes                                                      |
| RRMS 3         | 1                           | 50 (1/2)                                          | No                           | Yes                                                      |
| RRMS 4         | 1                           | 67 (2/3)                                          | No                           | No                                                       |
| SPMS 1         | 1                           | 0 (0/2)                                           | No                           | No                                                       |
| SPMS 2         | 1                           | 50 (1/2)                                          | No                           | No                                                       |
| SPMS 3         | 1                           | 33 (1/3)                                          | No                           | No                                                       |
| SPMS 4         | 1                           | 33 (1/3)                                          | No                           | No                                                       |
| DC 1           | 1                           | 33 (1/3)                                          | No                           | N/A                                                      |
| DC 2           | 1                           | 0 (0/3)                                           | No                           | No                                                       |
| DC 3           | 1                           | 0 (0/3)                                           | No                           | N/A                                                      |

rAb: recombinant antibody; N/A: not assessed; DC: disease control

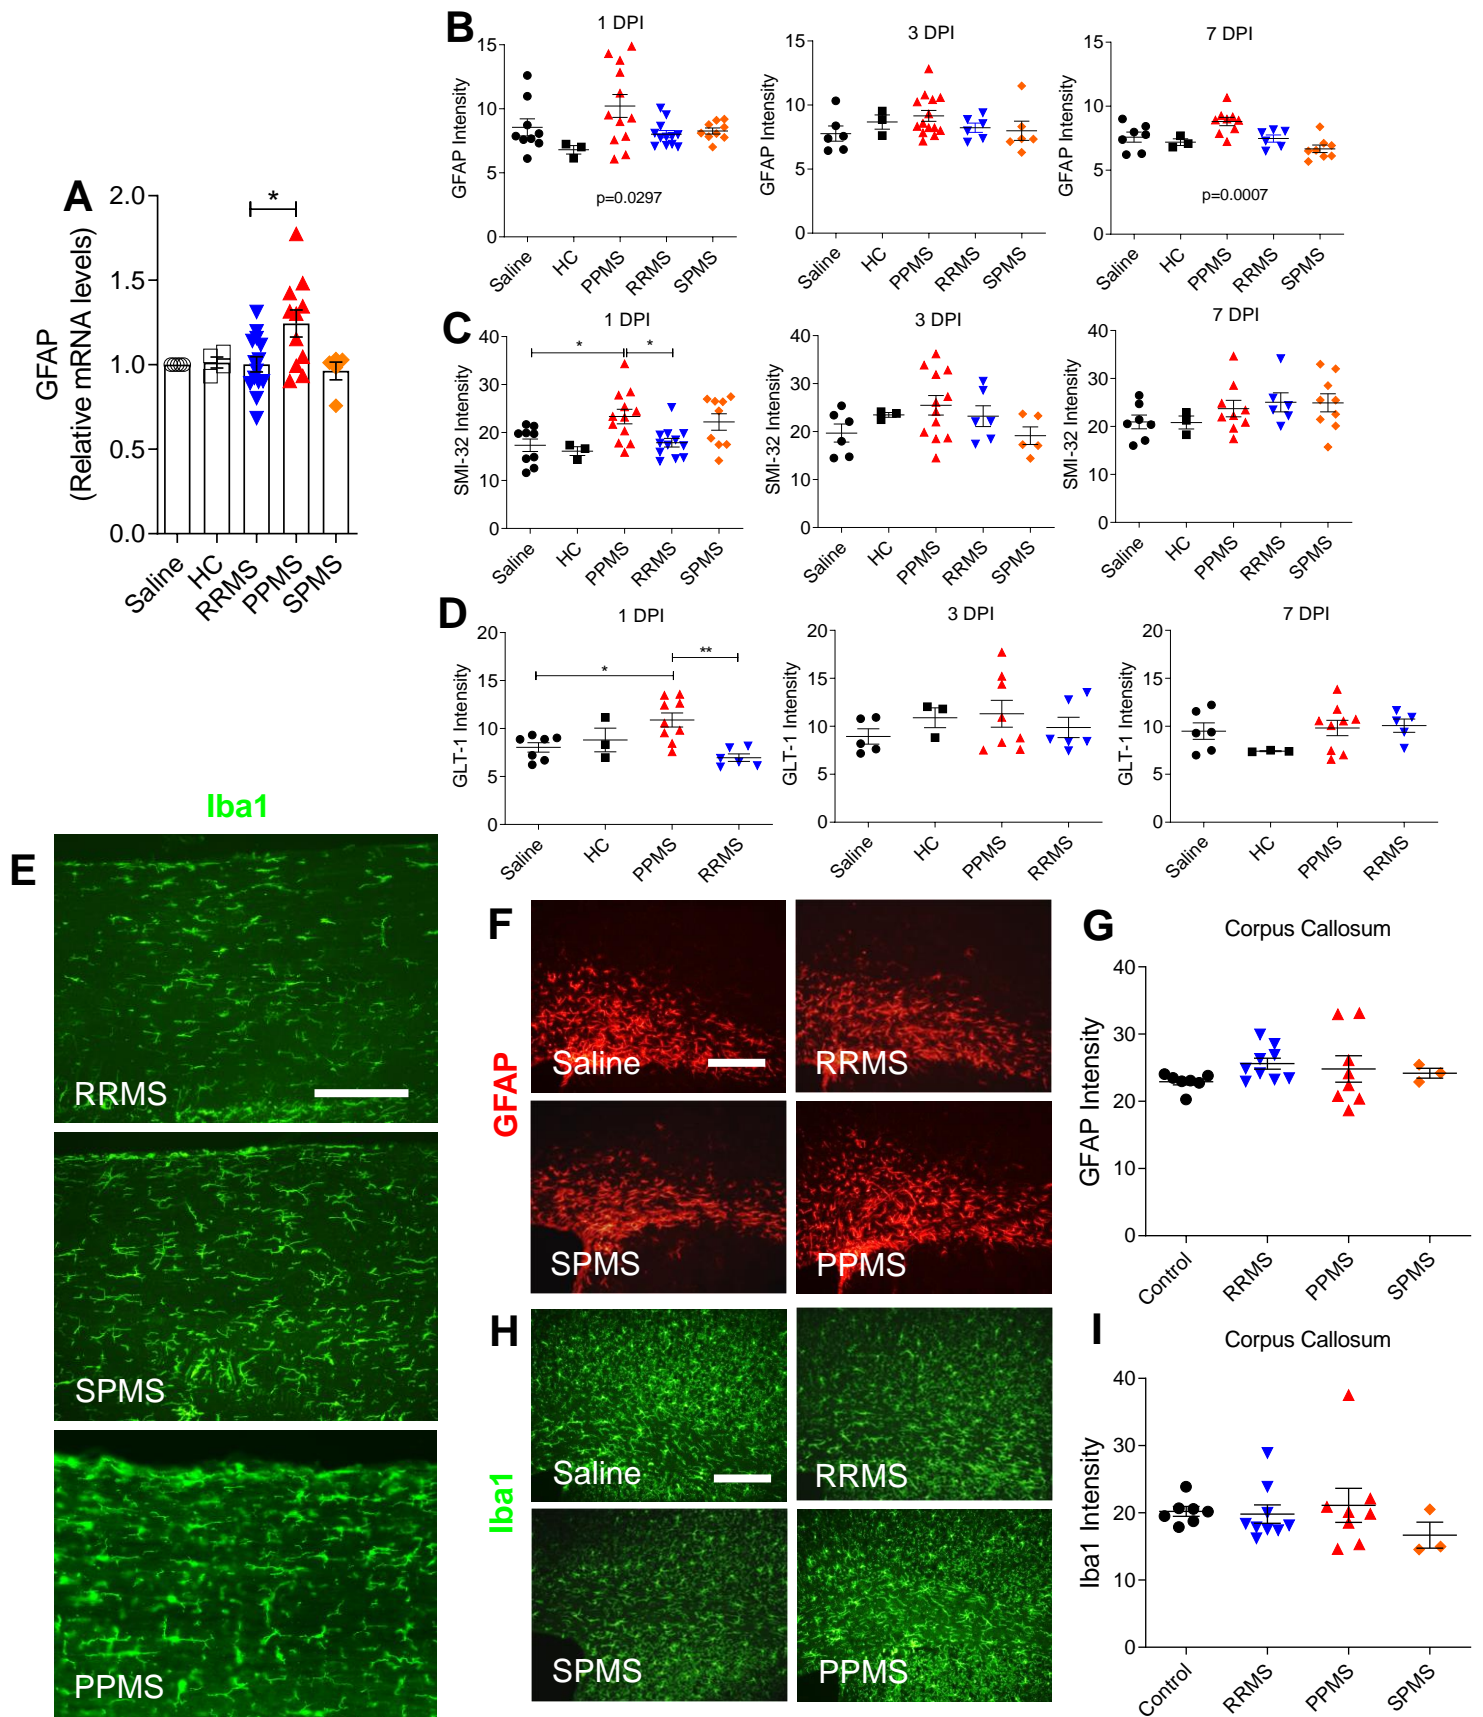

**Supplementary Figure 1. PPMS CSF induces pathology in the spinal cord but not the brain.** (A) GFAP mRNA levels are significantly elevated at 1 DPI in cervical spinal cords of PPMS CSF-injected mice. (B-D) Time course of protein expression of GFAP (B), SMI-32 (C), and GLT-1 (D) in the cervical spinal cord dorsal white matter at 1, 3 and 7 DPI. (E) Morphological changes in Iba1<sup>+</sup> microglia reveal greater activation in PPMS CSF-injected mice. (F-I) Corpus callosum GFAP (F and G) and Iba1 (H and I) immunostaining reveal a lack of reactive astrogliosis and microglial activation at 1 DPI in the brains of PPMS CSF-injected mice. Data plotted as mean  $\pm$  SEM. Each point represents an individual mouse. One-way ANOVA with Bonferroni's test. \*\* $P < 0.01$ , \* $P < 0.05$ . Scale bars, 100  $\mu$ m.

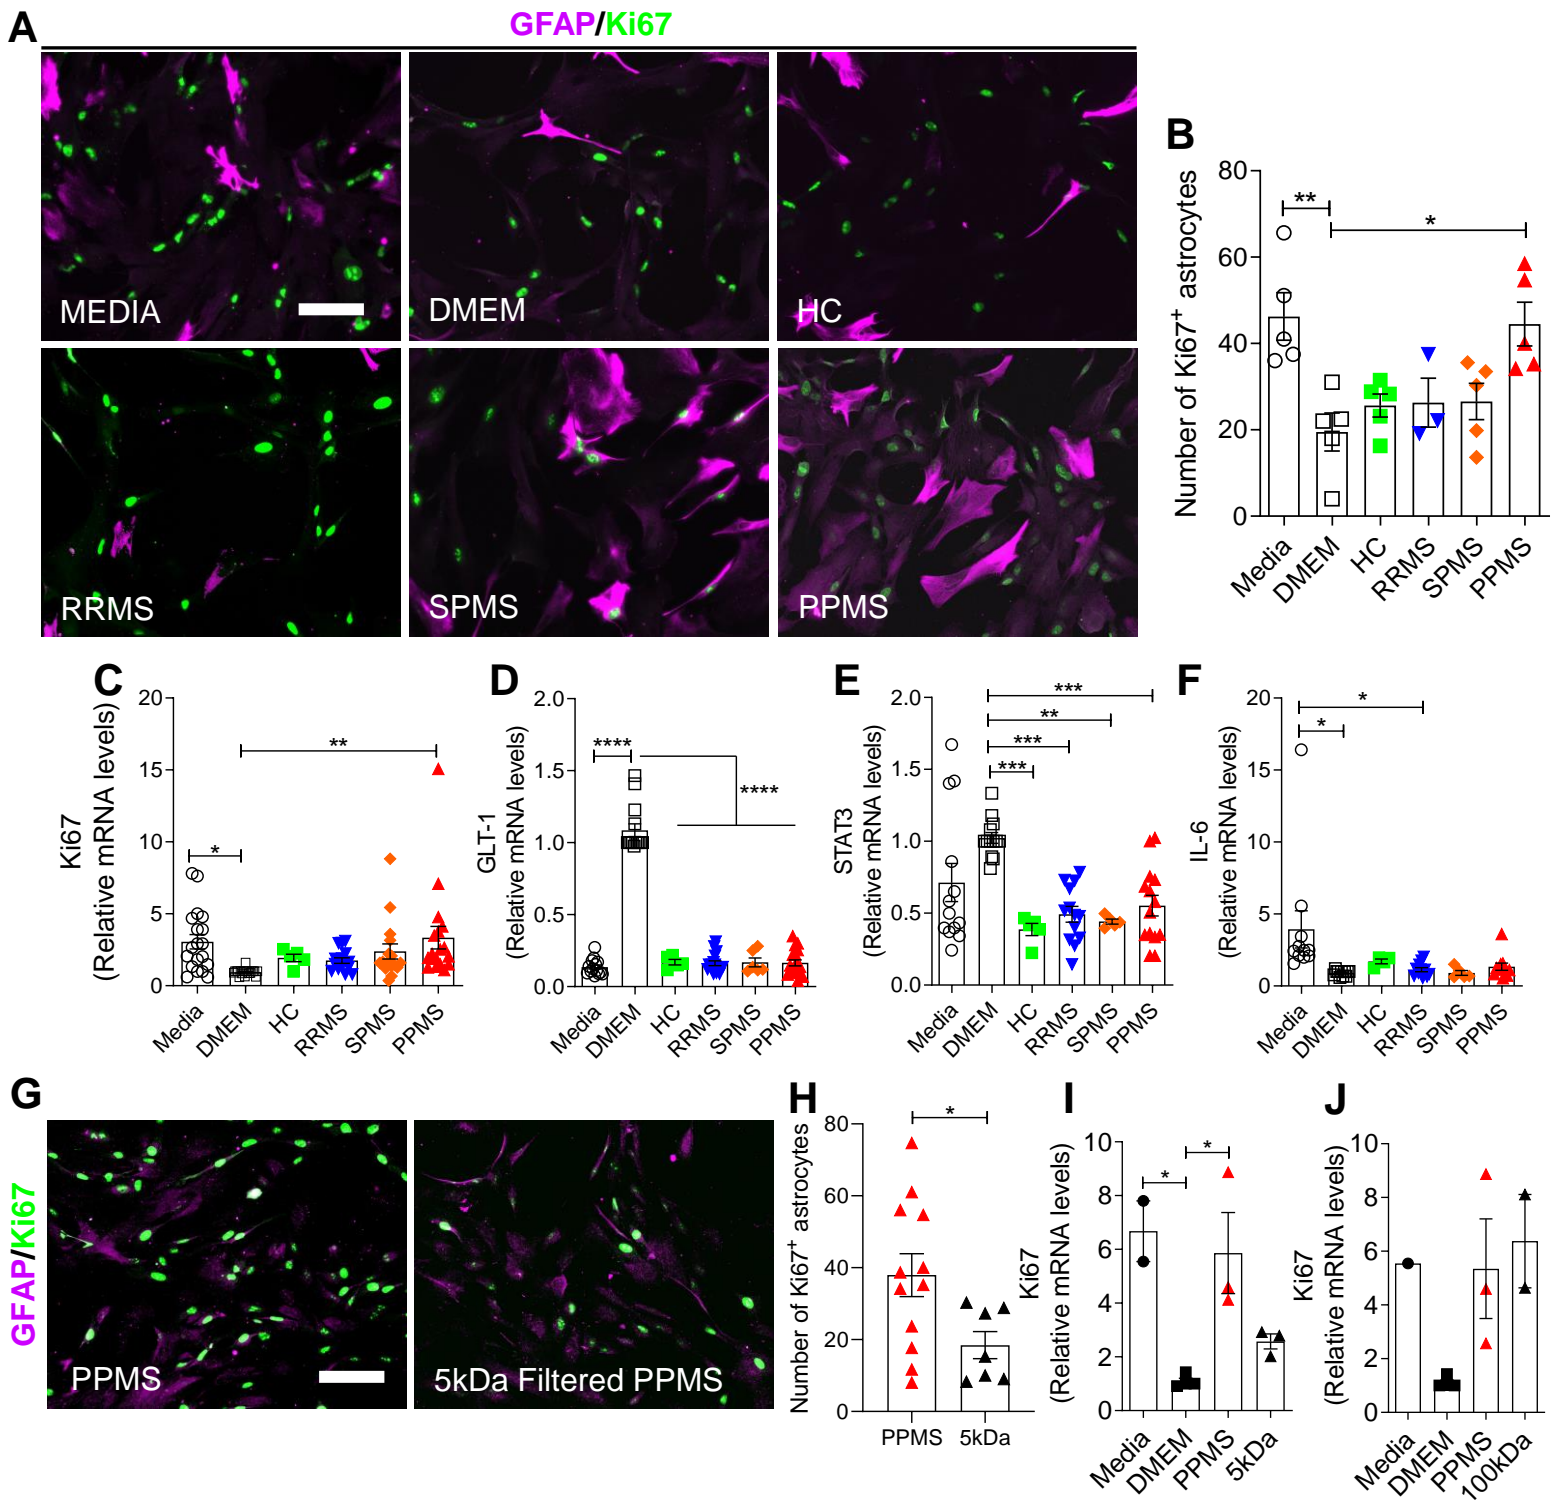

**Supplementary Figure 2. PPMS CSF, but not RRMS or SPMS CSF, induces proliferation of human astrocytes.**

(A) Representative images of GFAP and Ki67 immunostaining of primary human astrocytes incubated in media, DMEM, or CSF obtained from healthy controls, or RRMS, SPMS, or PPMS patients for 24 hours. Scale bar, 100  $\mu$ m. (B) Quantification of the number of Ki67<sup>+</sup> proliferating astrocytes following 24-hour exposure to 50% CSF. (C-F) Human astrocyte mRNA levels of Ki67 (C), GLT-1 (D), STAT3 (E), and IL-6 (F) following 24-hour exposure to 50% CSF, as measured by qPCR. (G) Representative images of GFAP and Ki67 immunostaining of primary human astrocytes incubated in 50% PPMS CSF or 5 kDa-filtered PPMS CSF for 24 hours. Scale bar, 100  $\mu$ m. (H) Quantification of the number of Ki67<sup>+</sup> proliferating astrocytes following 24-hour exposure to 50% PPMS CSF or 5 kDa-filtered PPMS CSF. (I and J) Ki67 mRNA levels in human astrocytes following 24-hour exposure to 50% PPMS CSF, 5 kDa-filtered PPMS CSF (I) or 100 kDa-filtered PPMS CSF (J).

Data plotted as mean  $\pm$  SEM. Each point represents an individual well. One-way ANOVA with Bonferroni's test (B-F, I, J). Two-tailed Student's t-test (H). \*\*\*\* $P$  < 0.0001, \*\*\* $P$  < 0.001, \*\* $P$  < 0.01, \* $P$  < 0.05.



## Human IgG

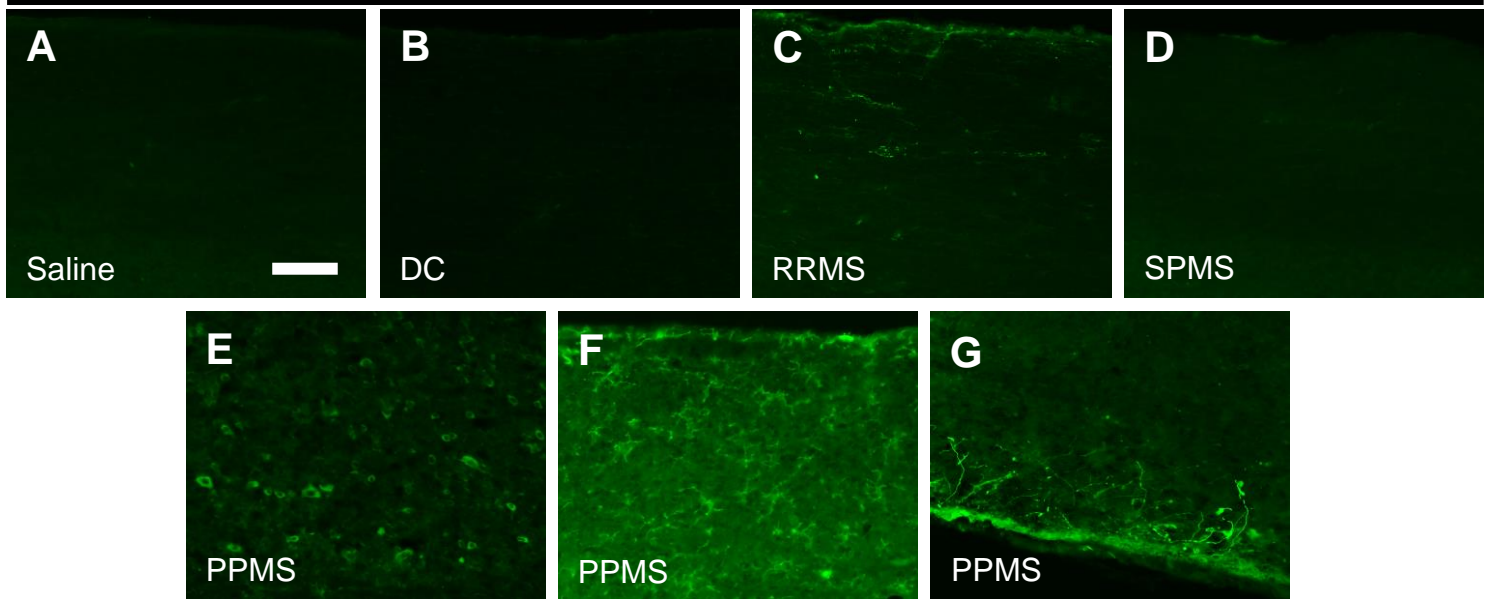

**Supplementary Figure 4. Heterogeneous human IgG staining in PPMS rAb-injected mice.** Representative images of human IgG immunostaining in cervical spinal cords of mice injected with saline (A), DC rAb (B), RRMS rAb (C), SPMS rAb (D), or PPMS rAbs (E-G) at 1 DPI. Patterns of human IgG staining in PPMS rAb-injected mice resemble neuronal morphology (E), microglial morphology (F), and axonal morphology (G). Scale bar, 100  $\mu$ m.



## **Supplementary Materials and Methods**

### **CSF Single Cell B-Cell FACS and Recombinant Antibody Production Pelleting Cells**

CSF obtained from lumbar puncture was transferred to a 15 mL polypropylene tube and immediately spun down at 170 x g for 15 min at room temperature. Cell-free CSF was removed except for a residual 300  $\mu$ L used to resuspend the pelleted cells for hemocytometer cell count. After cell count and transfer to a 1.5 mL tube, the remaining cells were pelleted again by spinning at 150 x g in a tabletop microcentrifuge. The remaining CSF was removed, and the cell pellet resuspended in 250  $\mu$ L PBS.

### **Immunostaining and FACS**

Human BD Fc Block<sup>TM</sup> (BD Biosciences cat. 564219) was added to the resuspended cells. Anti-human CD19-APC (BD Biosciences cat. 555415) and anti-human CD138-FITC (BD Biosciences cat. 552723) were then added to stain for CD19 and CD138, respectively. After staining for 30 min on ice, FACS was performed on a BD FACSAria<sup>TM</sup> II. Single cells were sorted into 24-well PCR plates (USA Scientific cat 1402-0240) containing reverse transcription (RT) buffer, dNTPs, RT primers (see the primer table in the next section), and 1% NP-40. Plates were then spun down at 1000 x g for 10 min and frozen overnight at  $-40^{\circ}\text{C}$  or below.

### **Reverse Transcription (RT) and Immunoglobulin (Ig) Gene PCRs**

Thawed plates were heated to  $65^{\circ}\text{C}$  for 5 min. Superscript<sup>TM</sup> III (Thermo Fisher cat. 18080044) reverse transcriptase was added and RT was performed according to manufacturer's protocol. After RT, RNase H (NEB cat. M0297L) was added and incubated for 20 min at room temperature. Ig variable region nested PCR was performed using the following primers sets modified from Wang and Stoller<sup>1</sup>:

| RT Primers                |    |                              |  |                           |    |                              |  |  |  |
|---------------------------|----|------------------------------|--|---------------------------|----|------------------------------|--|--|--|
| CMI                       | 5' | -GCAGGAGACGAGGGGA-3'         |  |                           |    |                              |  |  |  |
| CGI                       | 5' | -AGGGYGCCAGGGGAA-3'          |  |                           |    |                              |  |  |  |
| CAI                       | 5' | -TGGACCAGGCAKGCAYGAC-3'      |  |                           |    |                              |  |  |  |
| CKI                       | 5' | -AACAGAGGCAGTCCAGA-3'        |  |                           |    |                              |  |  |  |
| CLI                       | 5' | -TGTGGCCTTGTGGCTT-3'         |  |                           |    |                              |  |  |  |
|                           |    |                              |  |                           |    |                              |  |  |  |
| Outer light chain primers |    |                              |  | Outer heavy chain primers |    |                              |  |  |  |
| VKL-1                     | 5' | -GCTCAGCTCCTGGGGCTCCTG-3'    |  | VHL-1                     | 5' | -TCACCATGGACTGSACCTGGA-3'    |  |  |  |
| VKL-2                     | 5' | -CTGGGGCTGCTAATGCTCTGG-3'    |  | VHL-2                     | 5' | -CCATGGACACACTTTGYTCCAC-3'   |  |  |  |
| VKL-3                     | 5' | -TTCCTCCTGCTACTCTGGCTC-3'    |  | VHL-3                     | 5' | -TCACCATGGAGTTTGGGCTGAGC-3'  |  |  |  |
| VKL-4                     | 5' | -CAGACCCAGGTCTTCATTCT-3'     |  | VHL-4                     | 5' | -AGAACATGAAACAYCTGTGGTTCT-3' |  |  |  |
|                           |    |                              |  | VHL-5                     | 5' | -ATGGGGTCAACCGCCATCCT-3'     |  |  |  |
| VLL-1                     | 5' | -CCTCTCCTCCTCACCCCTCT-3'     |  | VHL-6                     | 5' | -ACAATGTCTGTCTCCTCCTCAT-3'   |  |  |  |
| VLL-2                     | 5' | -CTCCTCACTCAGGGCACA-3'       |  |                           |    |                              |  |  |  |
| VLL-3                     | 5' | -ATGGCCTGGAYCSCTCTCC-3'      |  | CGII                      | 5' | -GCCAGGGGAAGACSGATG-3'       |  |  |  |
|                           |    |                              |  | CMI                       | 5' | -CAGGAGACGAGGGGAAAAG-3'      |  |  |  |
| CKII                      | 5' | -TTTCAACTGCTCATCAGATGGCGG-3' |  | CAII                      | 5' | -YMGAGGCTCAGCGGAAGAC-3'      |  |  |  |
| CLII                      | 5' | -AGCTCCTCAGAGGGYGG-3'        |  |                           |    |                              |  |  |  |
|                           |    |                              |  |                           |    |                              |  |  |  |
|                           |    |                              |  |                           |    |                              |  |  |  |
| Inner light chain primers |    |                              |  | Inner heavy chain primers |    |                              |  |  |  |
| VKF-1                     | 5' | -CGMCATCCRGWTGACCCAGT-3'     |  | VHF-1                     | 5' | -CAGGTSCAGCTGGTRCAGTC-3'     |  |  |  |
| VKF-2                     | 5' | -CGATRTTGTGATGACYCAG-3'      |  | VHF-2                     | 5' | -CAGRTCACCTTGAAGGAGTC-3'     |  |  |  |
| VKF-3                     | 5' | -CGAAATWGTGWTGACRCAGTCT-3'   |  | VHF-3                     | 5' | -SAGGTGCAGCTGGTGGAGTC-3'     |  |  |  |
| VKF-4                     | 5' | -CGACATCGTGATGACCCAGT-3'     |  | VHF-4                     | 5' | -CAGGTGCAGCTGCAGGAGTC-3'     |  |  |  |
|                           |    |                              |  | VHF-5                     | 5' | -GARGTGCAGCTGGTGCAGTC-3'     |  |  |  |
| VLF-1                     | 5' | -CCAGTCTGTGCTGACTCAGC-3'     |  | VHF-6                     | 5' | -CAGGTACAGCTGCAGCAGTC-3'     |  |  |  |
| VLF-2                     | 5' | -CCAGTCTGCCCTGACTCAGC-3'     |  |                           |    |                              |  |  |  |
| VLF-3                     | 5' | -CTCCTATGAGCTGACWCAGC-3'     |  | CGIII                     | 5' | -GACSGATGGGCCCTTGGTGA-3'     |  |  |  |
|                           |    |                              |  | CMI                       | 5' | -GAAAAGGGTTGGGGCGGATGC-3'    |  |  |  |
| CKIII                     | 5' | -AAGATGAAGACAGATGGTGC-3'     |  | CAIII                     | 5' | -GGAAGACCTTGGGGCTGGTC-3'     |  |  |  |
| CLIII                     | 5' | -GYGGAAACAGAGTGACCG-3'       |  |                           |    |                              |  |  |  |

After 2 rounds of PCR, products were visualized in agarose gels. Bands were excised, purified, and cloned into sequencing plasmids. After sequencing, light and heavy variable regions were analyzed for clonal expansion.

## Sequence Analysis

Sequenced full length variable regions were aligned at IMGT.com using their IMGT/V-Quest alignment software. The third complementarity-determining region (CDR3) was used to identify clonally expanded cells. Cells with identical CDR3 heavy chain regions must have identical CDR3 light chain regions to be considered expanded. Expanded cells were defined as 2 or more cells with identical CDR3 heavy and light chain regions. Ig isotype can also be determined via the sequenced reverse primer (which primes in the CH1 constant region) and verified by the small remaining CH1 sequence amplified by the PCR. Kappa or lambda light chains were also identified similarly. Sequencing data are available on the Tisch MSRCNY website at [www.tischms.org](http://www.tischms.org).

## Recombinant Antibody Production

IgG1 constant region sequence and either lambda or kappa constant region sequence were added to the variable regions to obtain full heavy and light chain sequences, respectively. In addition, human signal sequence for protein secretion was added to both chains. Heavy chains were cloned into expression plasmid pOptiVEC™ (Thermo Fisher, cat. 12744017) and light chains were cloned into expression plasmid pcDNA3.3™ (Thermo Fisher, cat. K830001). Plasmids were transfected in HEK293-F cells (Thermo Fisher, cat. R79007) using the Freestyle™ MAX 293 Expression System (Thermo Fisher, cat. K900010). After transfection, antibodies were produced in a shake flask on an orbital platform (Thermo MaxQ 2000 CO<sub>2</sub> Plus, cat. 88881103) set to 225 rpm in 8% CO<sub>2</sub> at 37°C for 5-7 days. Recombinant antibodies were purified by running through a Protein G agarose column (Thermo Fisher, cat. 20397). Purified proteins were eluted (Thermo Fisher cat. 21004) and dialyzed into PBS.

## References

1. Wang X, Stollar BD. Human immunoglobulin variable region gene analysis by single cell RT-PCR. *J Immunol Methods*. 2000;244:217-225.
